# Supplementary material for: Myopia-26, the female-limited form of early-onset high myopia, occurring in a European family
Source: PubMed Central journal article supplement (PMC7825233; doi:10.1186/s13023-021-01673-z), 2021-01-22
Supplement: 13023_2021_1673_MOESM2_ESM.pdf [file 13023_2021_1673_MOESM2_ESM.pdf]

SUPPLEMENTARY FIGURES II.  
Electrophysiology

**photopic 3.0**

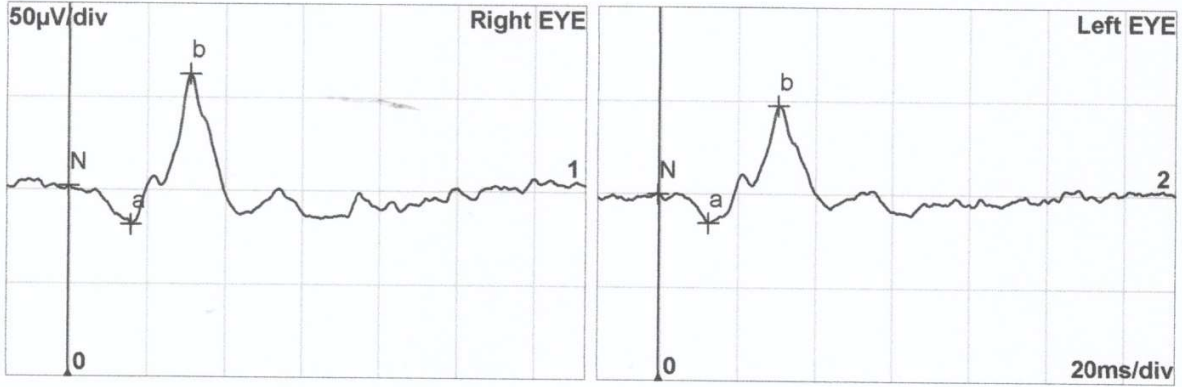

| Channel | a [ms] | b [ms] | a-wave | b-wave |
|---------|--------|--------|--------|--------|
| 1 R-1   | 16     | 31     | 20,6µV | 81µV   |
| 2 L-2   | 13     | 31     | 15,5µV | 63,2µV |

Normals - -

**30Hz Flicker 3.0**

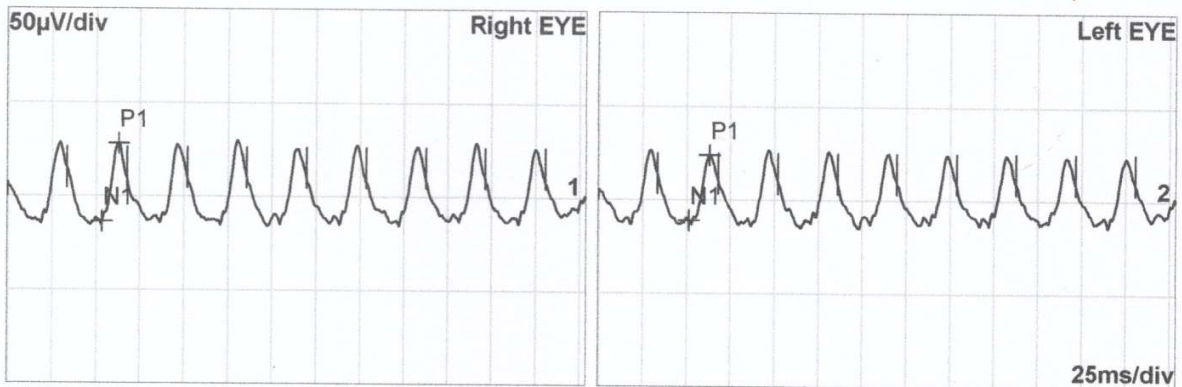

| Channel | N1 [ms] | P1 [ms] | N1-P1  |
|---------|---------|---------|--------|
| 1 R-1   | 54      | 64      | 41,5µV |
| 2 L-2   | 52      | 64      | 35µV   |

Figure S22. Standard full-field ERG recording of patient III/3.

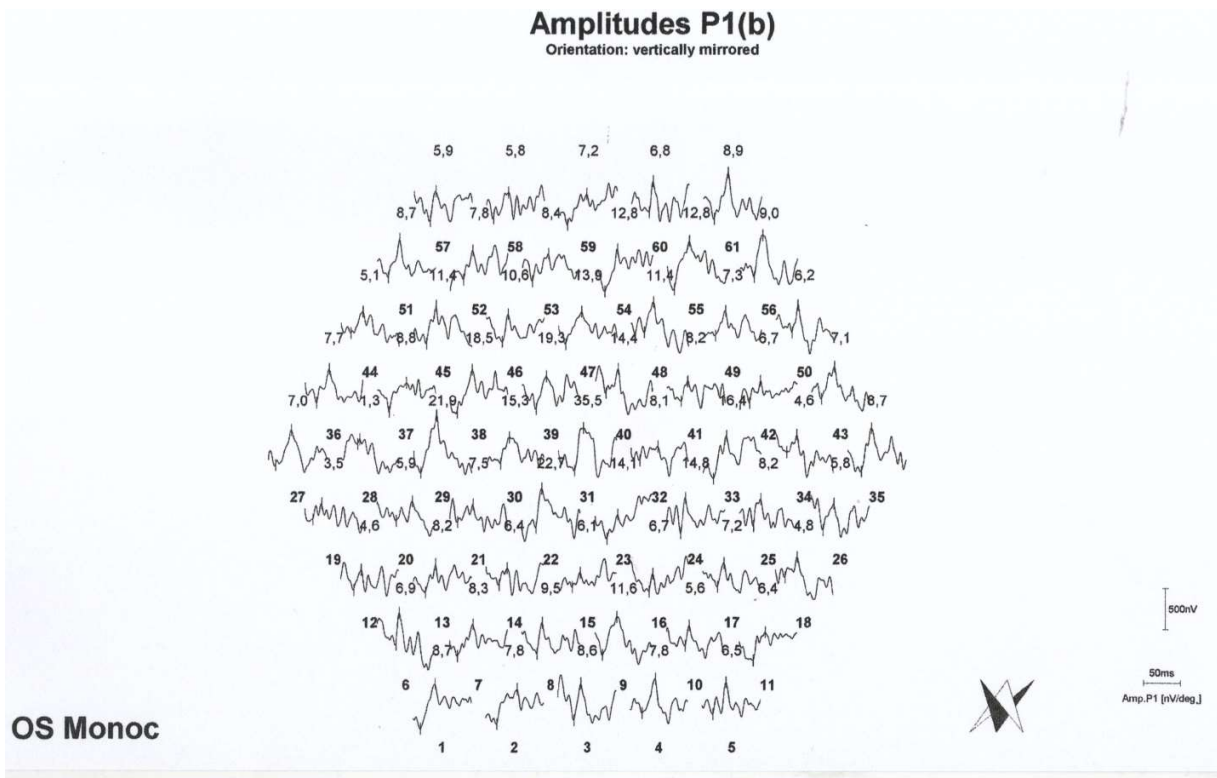

Figure S23. mfERG recording of patient III/3, OS.

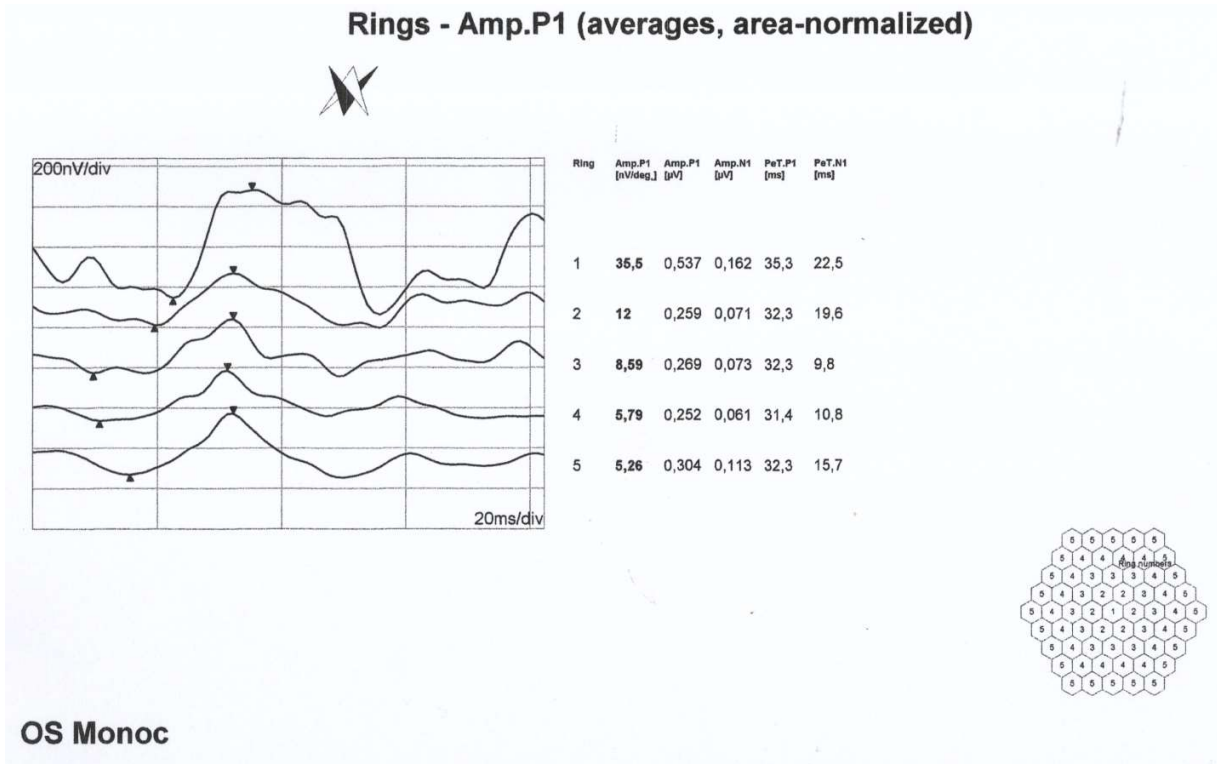

Figure S24. mfERG ring analysis of patient III/3, OS.

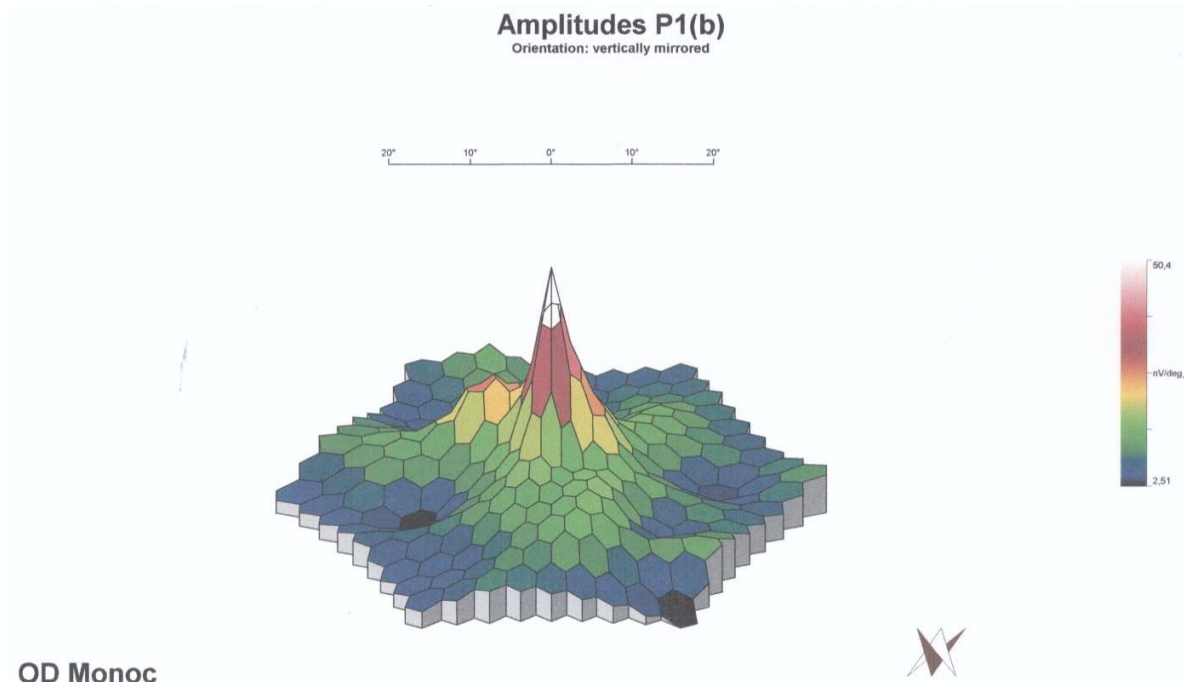

**OD Monoc**

Figure S25. Multifocal ERG 3 D colour map of III/3 carrier male right eye displays overall normal central macular function with scarce subnormal responses only.

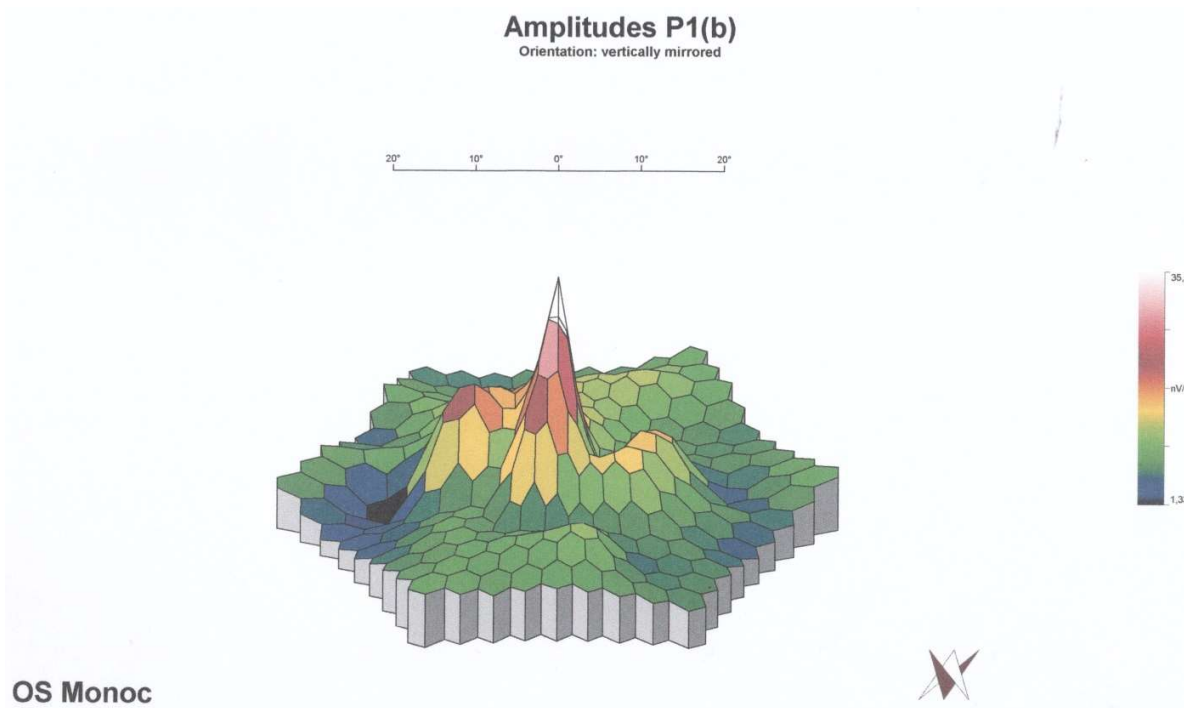

**OS Monoc**

Figure S26. Multifocal ERG 3 D colour map of III/3 carrier male, left eye displays overall normal central macular function with scarce subnormal responses only.

## Pattern-ERG

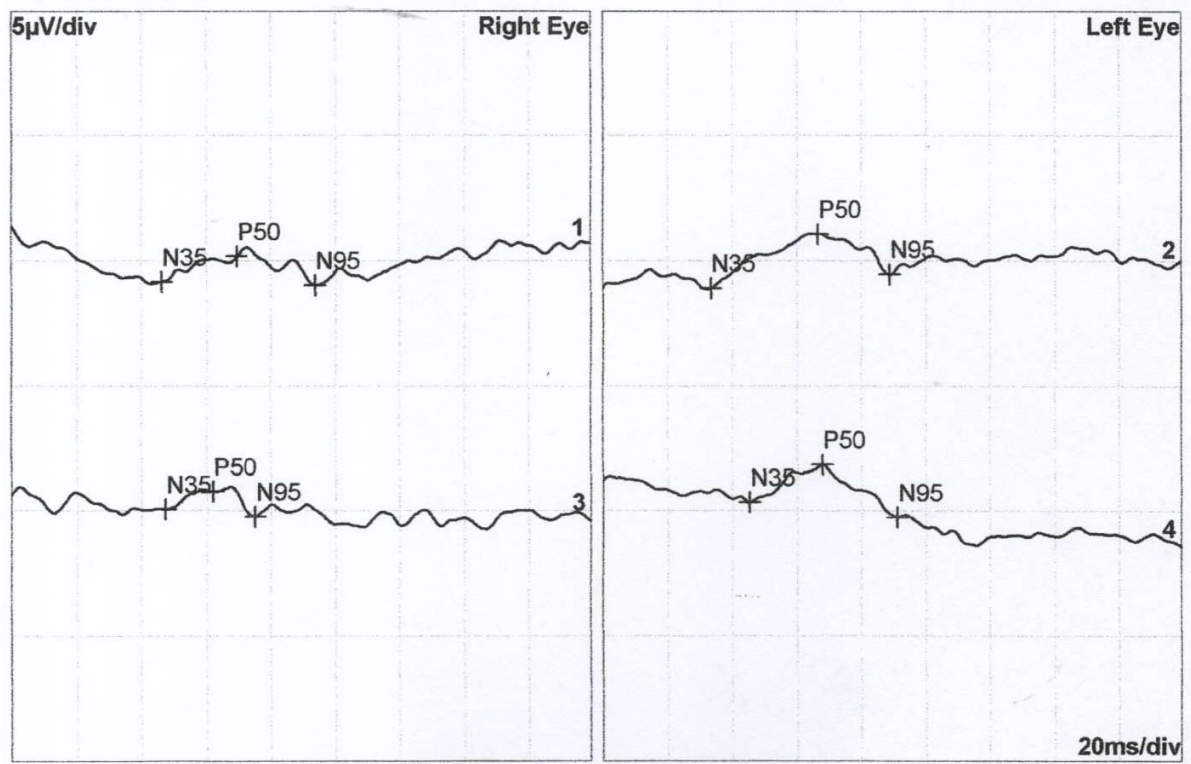

Figure S27. PERG recording of patient III/8. Lines 1 and 3 and lines 2 and 4 represent pairs of replicate measurements.

### Pattern-VEP

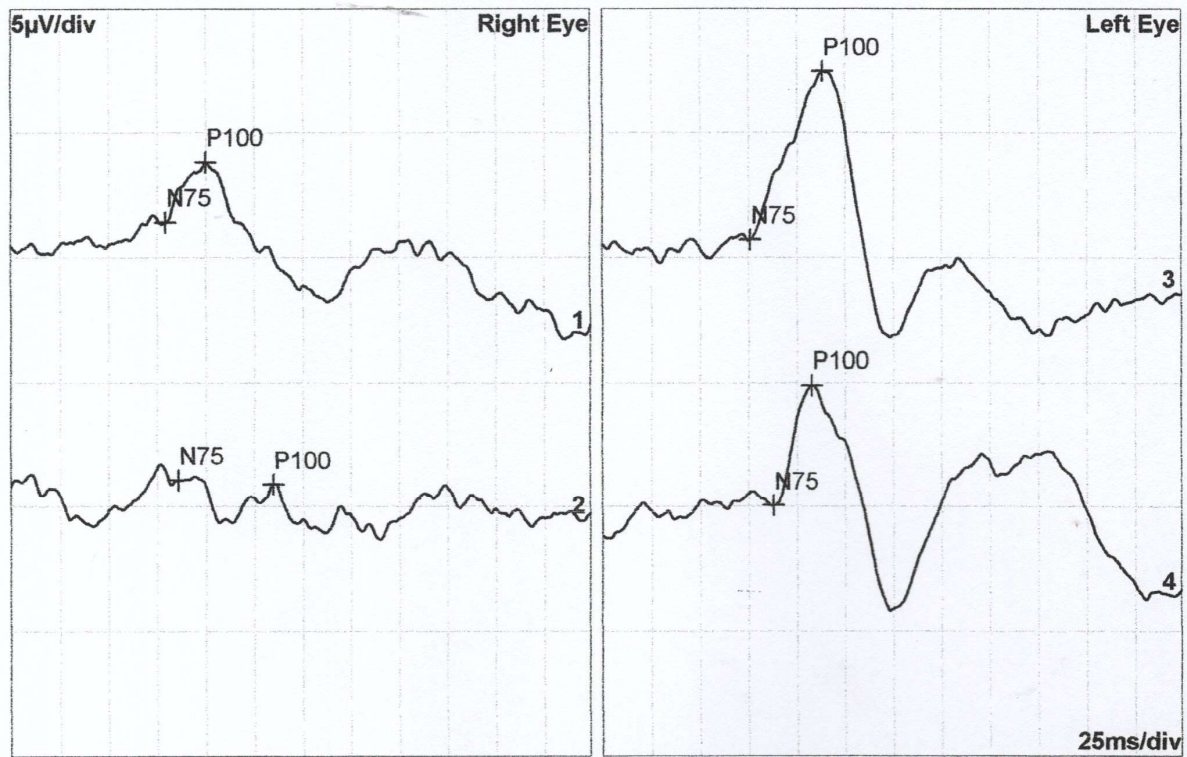

Figure S28. pVEP recording of patient III/8. Lines 1 and 3 display responses to 60' stimuli and lines 2 and 4 represent responses to 15' stimuli.



### photopic 3.0

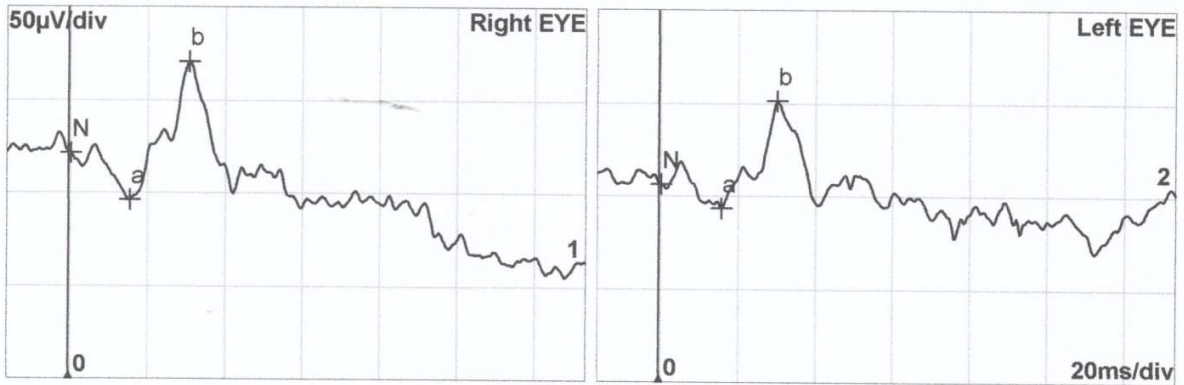

| Channel | a [ms] | b [ms] | a-wave | b-wave |
|---------|--------|--------|--------|--------|
| 1 R-1   | 16     | 31     | 25,6µV | 74,5µV |
| 2 L-2   | 16     | 31     | 13µV   | 58,1µV |

Normals - -

### 30Hz Flicker 3.0

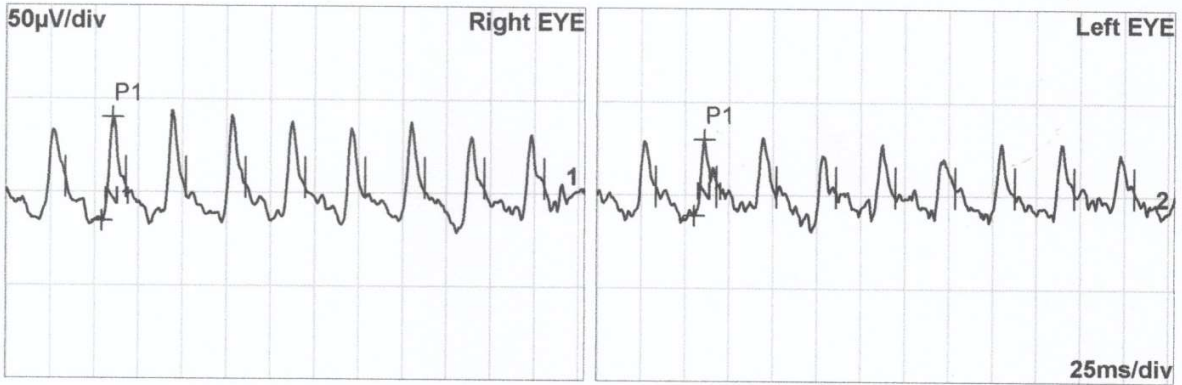

| Channel | N1 [ms] | P1 [ms] | N1-P1  |
|---------|---------|---------|--------|
| 1 R-1   | 55      | 61      | 55,6µV |
| 2 L-2   | 56      | 62      | 40,9µV |

Figure S29. Standard full-field ERG recording of patient IV/1.

### Pattern-ERG

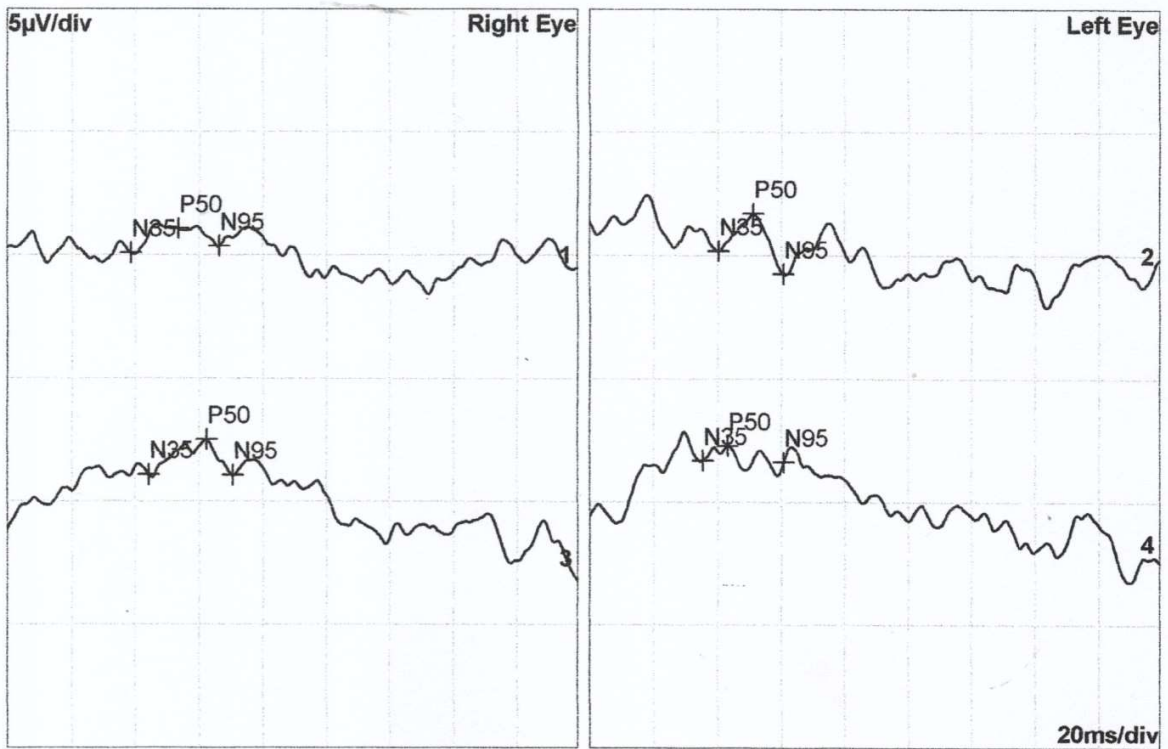

Figure S30. PERG recording of patient IV/1. Lines 1 and 3 and lines 2 and 4 represent pairs of replicate measurements.

### Pattern-VEP

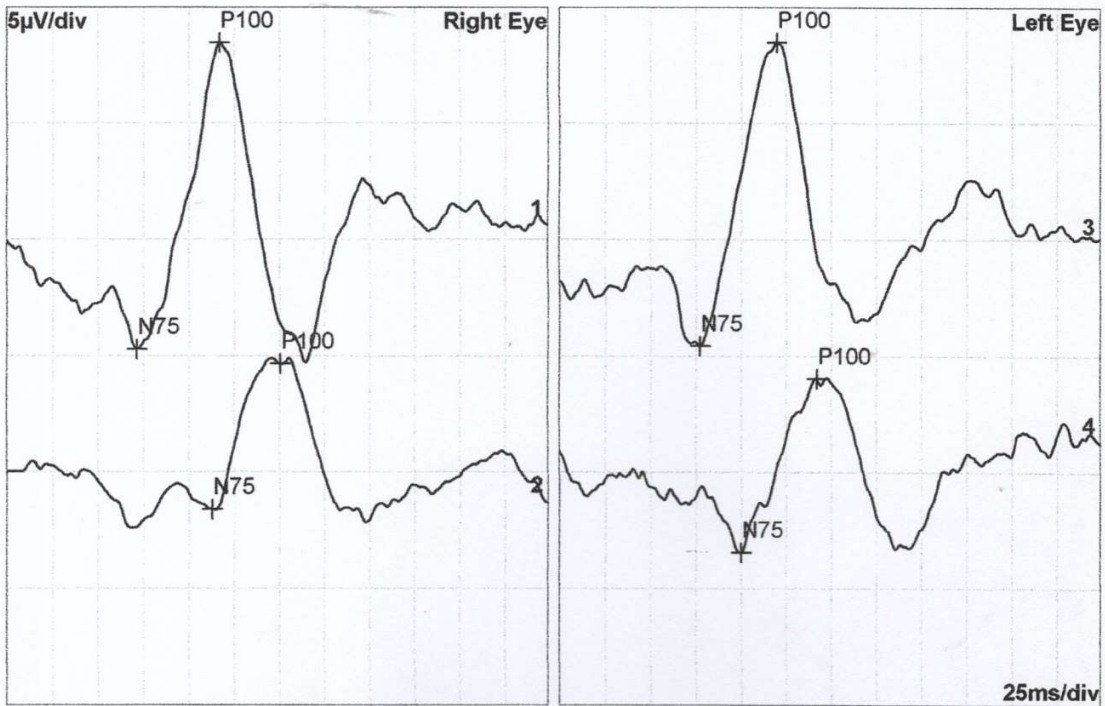

Figure S31. pVEP recording of patient IV/1. Lines 1 and 3 display responses to 60' stimuli and lines 2 and 4 represent responses to 15' stimuli.

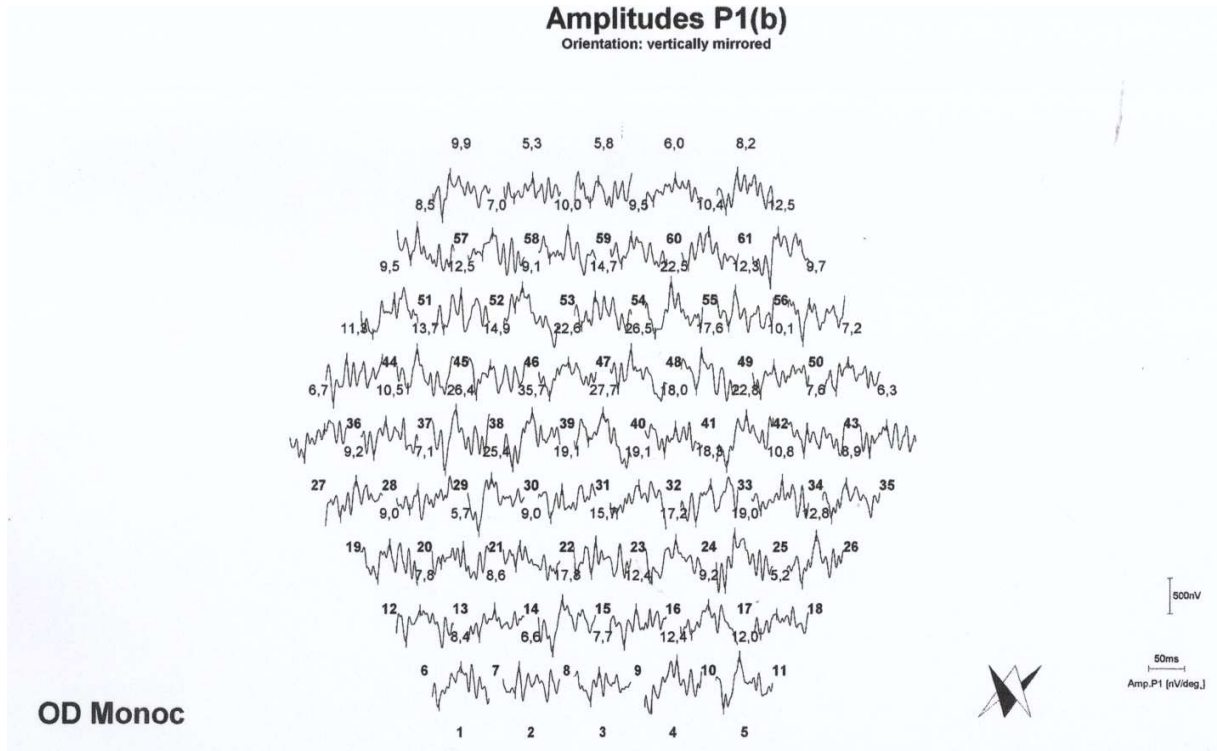

Figure S32. mfERG recording of patient IV/1, OD.

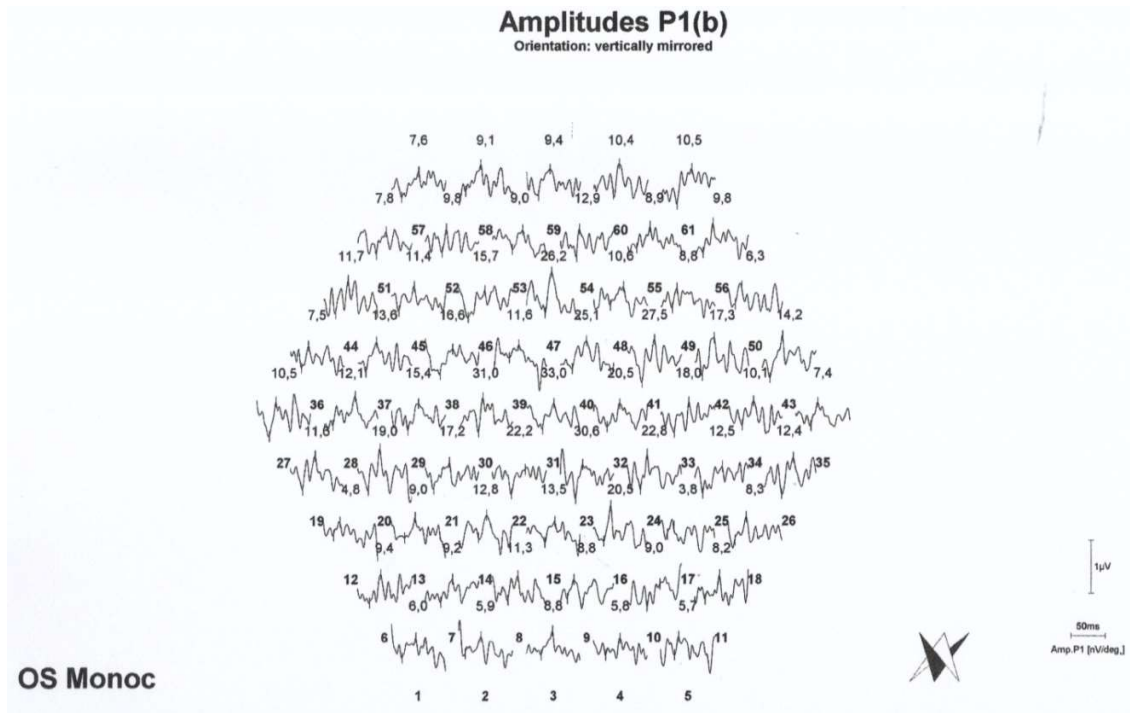



Figure S33. mfERG recording of patient IV/1,, OS.

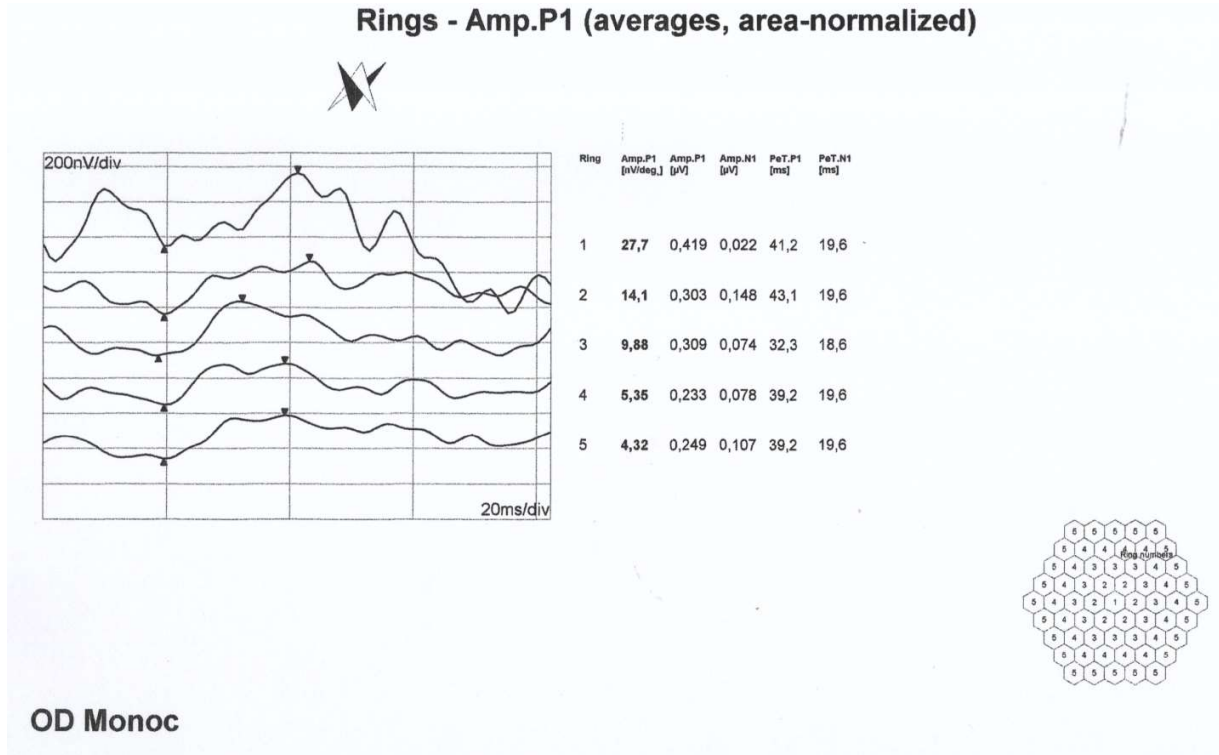

Figure S34. mfERG ring analysis of patient IV/1, OD.

### Rings - Amp.P1 (averages, area-normalized)

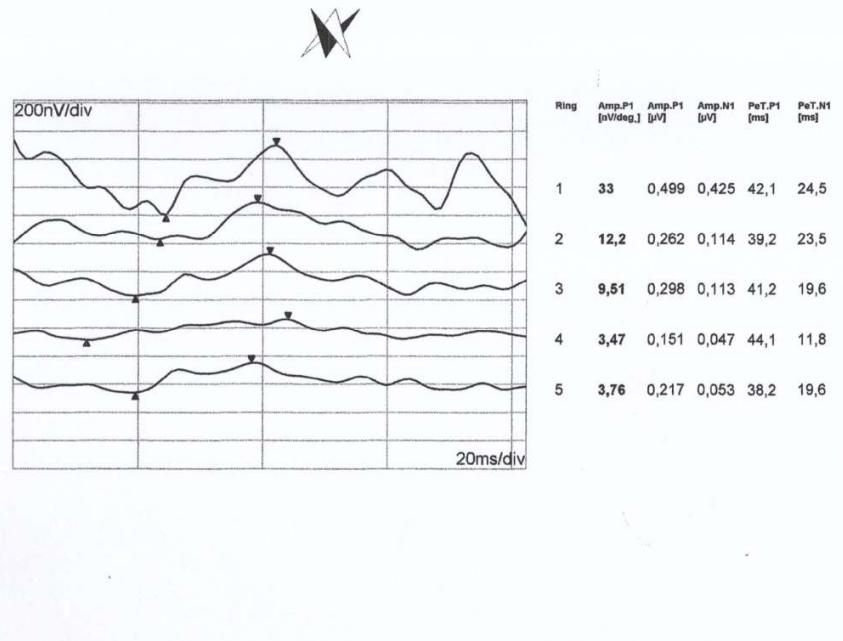

OS Monoc

Figure S35. mfERG ring analysis of patient IV/1, OS.

### Amplitudes P1(b)

Orientation: vertically mirrored

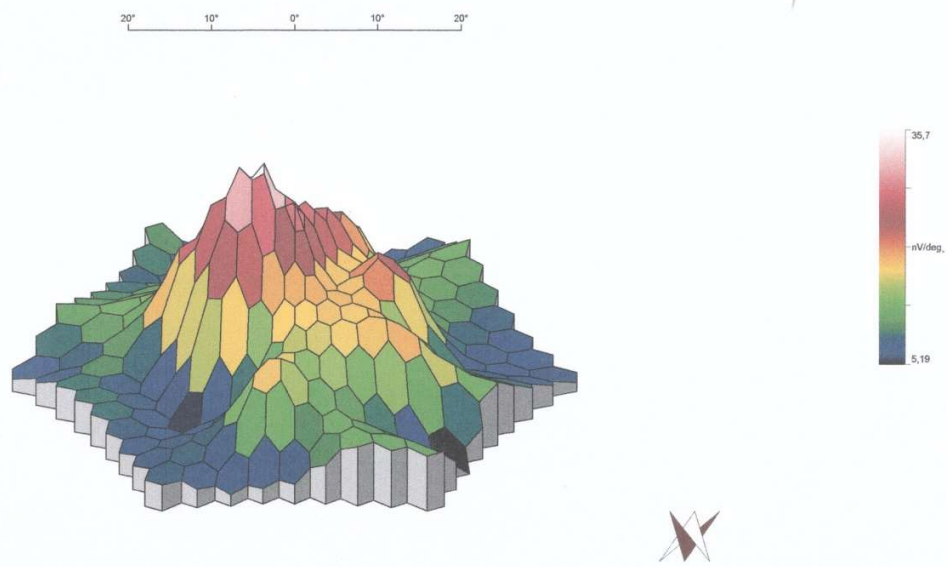

OD Monoc

Figure S36. Multifocal ERG 3 D colour map of patient IV/1, OD

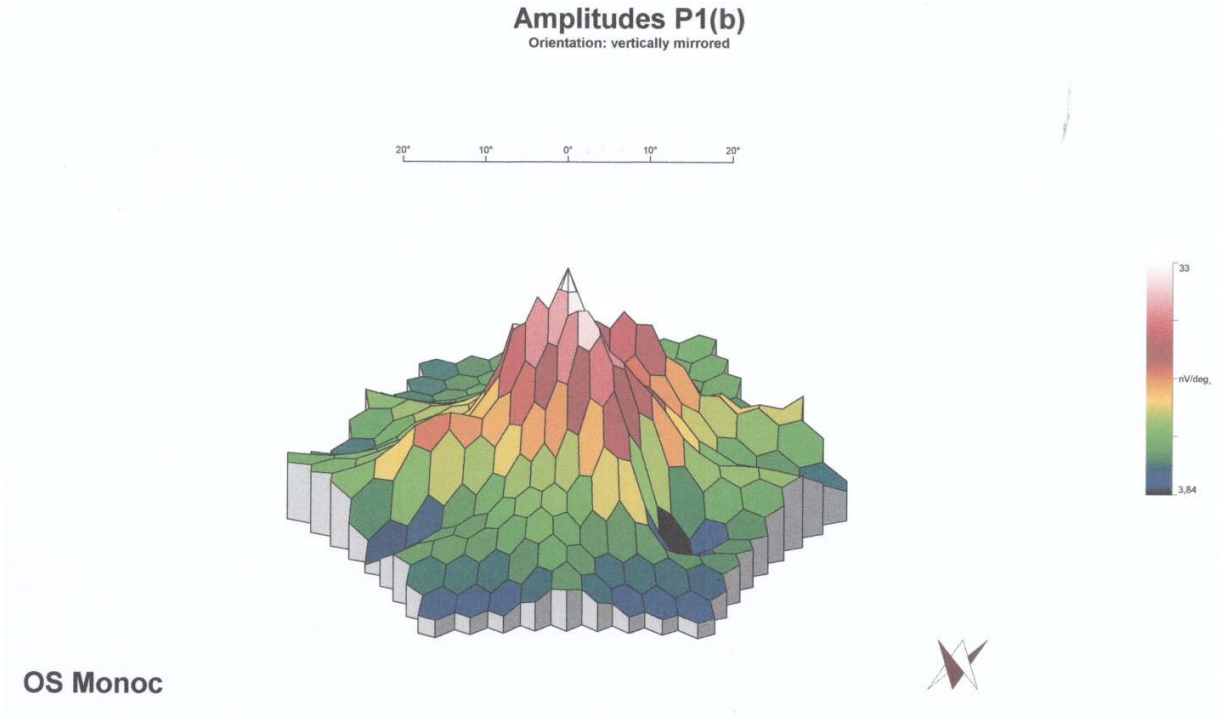

Figure S37. Multifocal ERG 3 D colour map of patient IV/1, OS

### photopic 3.0

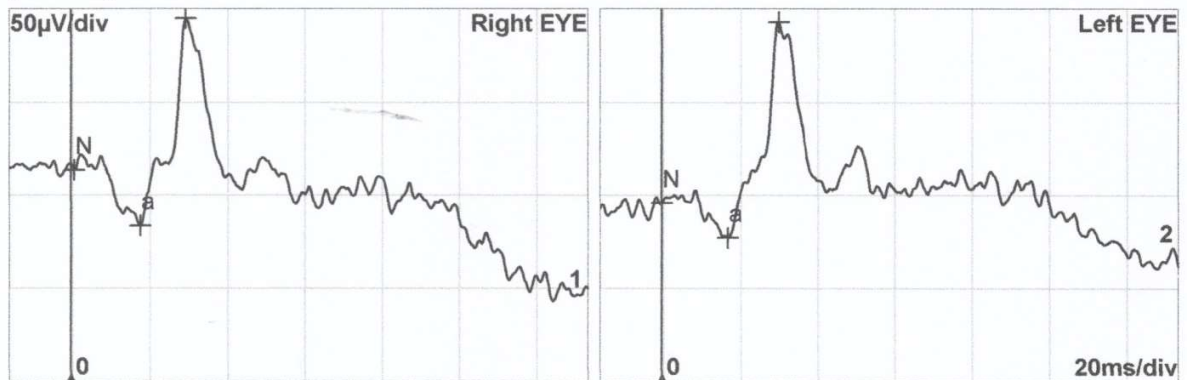

| Channel | a [ms] | b [ms] | a-wave | b-wave |
|---------|--------|--------|--------|--------|
| 1 R-1   | 18     | 30     | 30µV   | 111µV  |
| 2 L-2   | 17     | 30     | 18,7µV | 116µV  |

Normals - -

### 30Hz Flicker 3.0

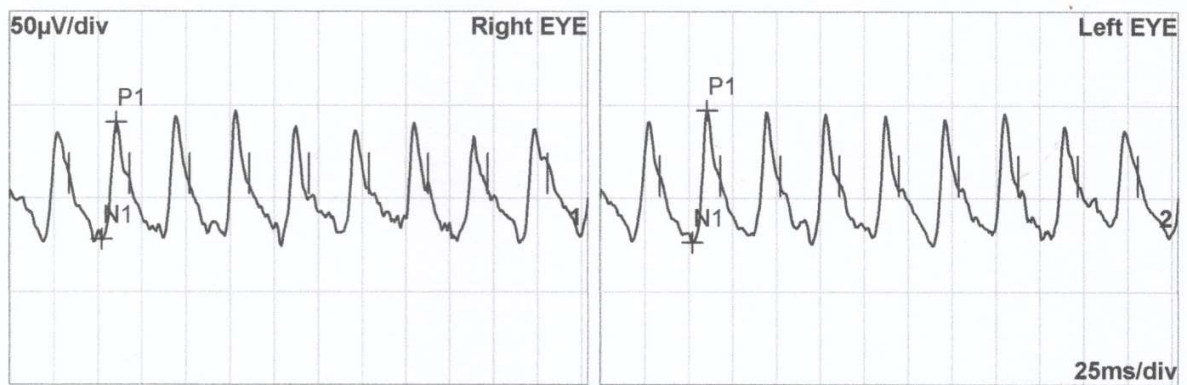

| Channel | N1 [ms] | P1 [ms] | N1-P1  |
|---------|---------|---------|--------|
| 1 R-1   | 53      | 61      | 63,1µV |
| 2 L-2   | 53      | 61      | 70,7µV |

Figure S38. Standard full-field ERG recording of patient IV/2.

### Pattern-ERG

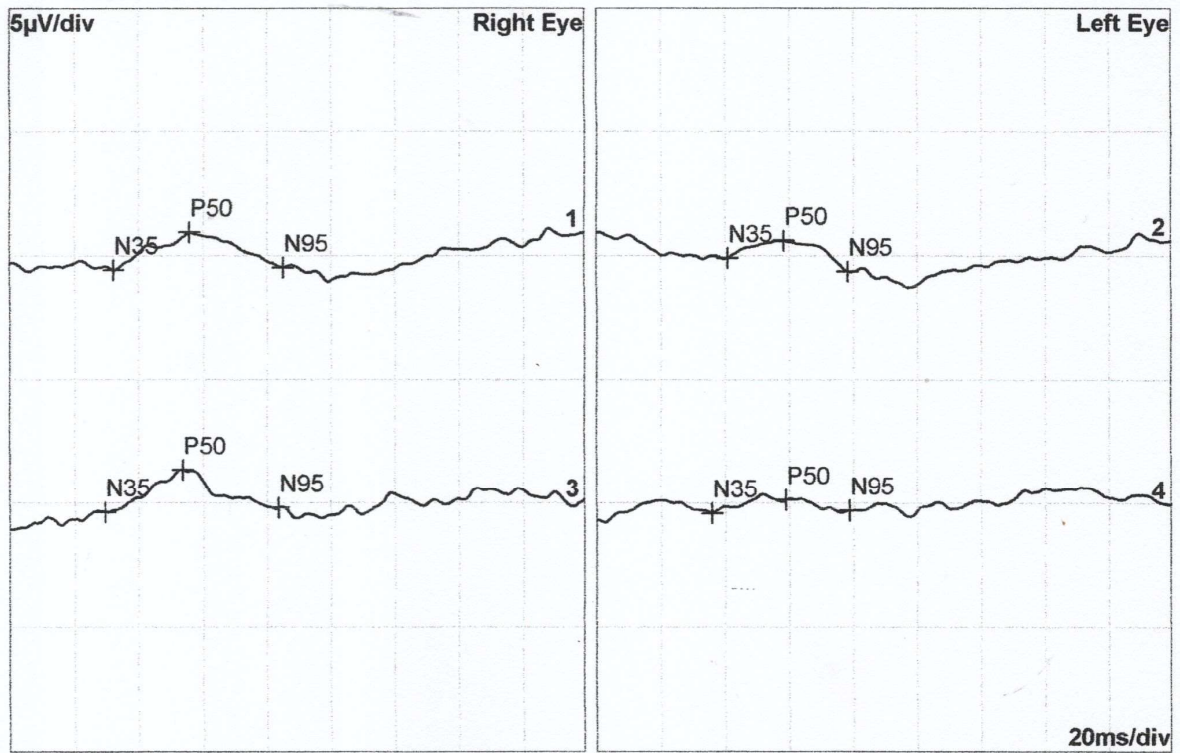

Figure S39. PERG recording of patient IV/2. Lines 1 and 3 and lines 2 and 4 represent pairs of replicate measurements.

### Pattern-VEP

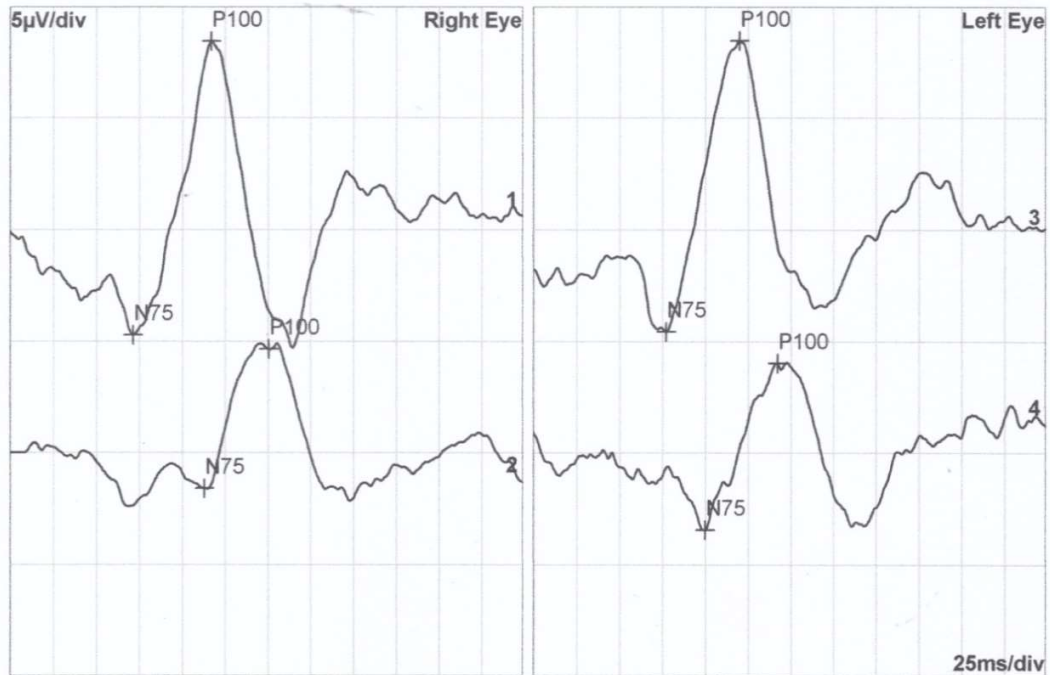



Figure S40. pVEP recording of patient IV/2. Lines 1 and 3 display responses to 60' stimuli and lines 2 and 4 represent responses to 15' stimuli.

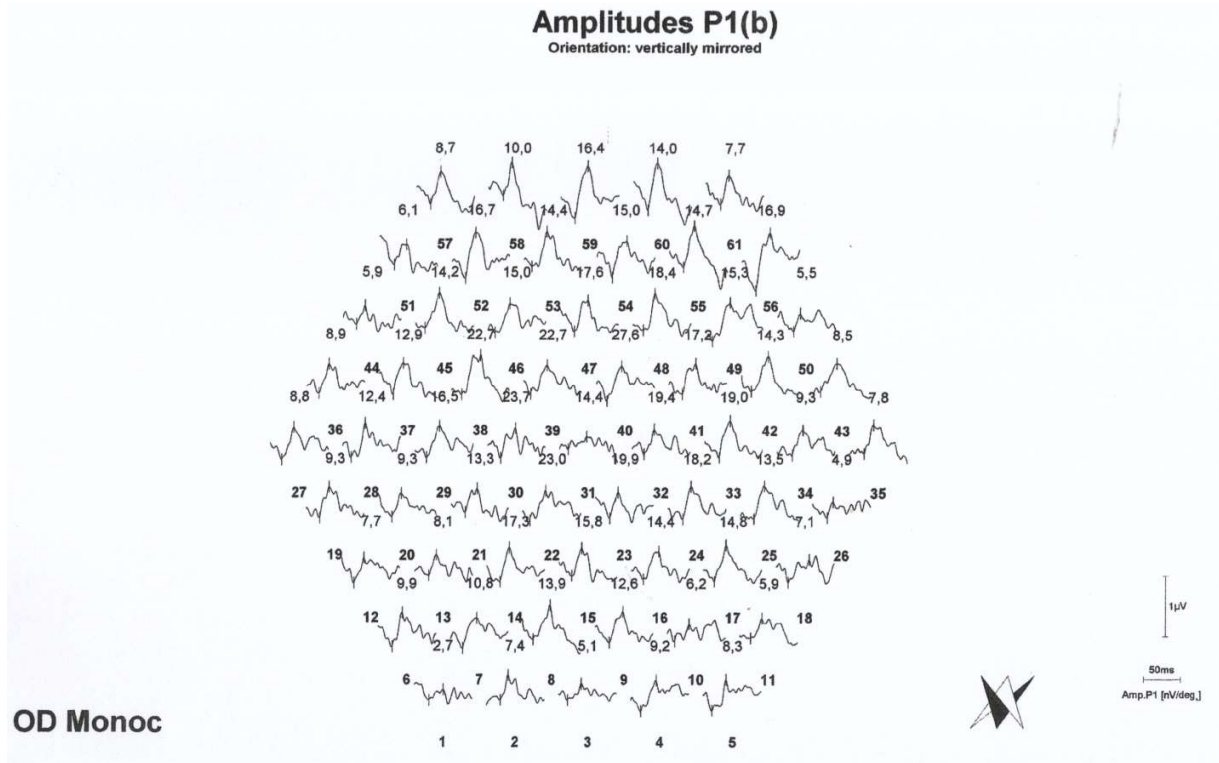

Figure S41. mfERG recording of patient IV/2, OD.

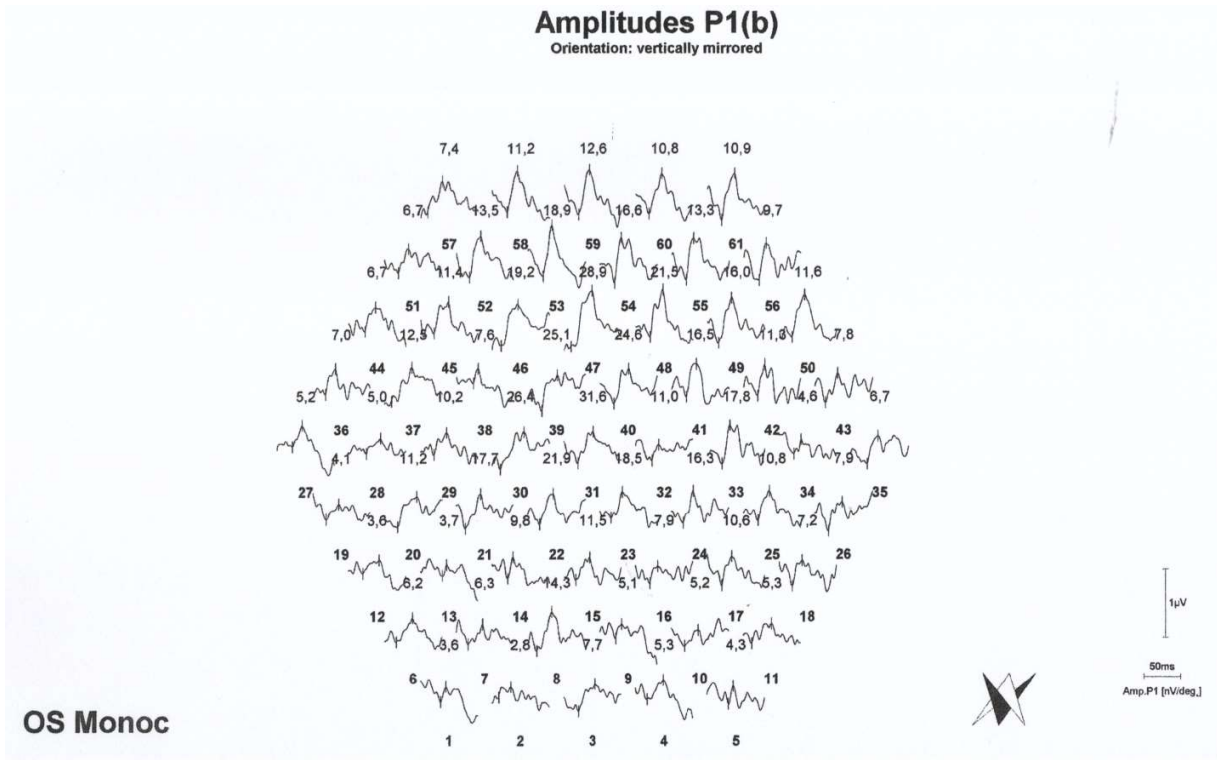

Figure S42. mfERG recording of patient IV/2, OS.

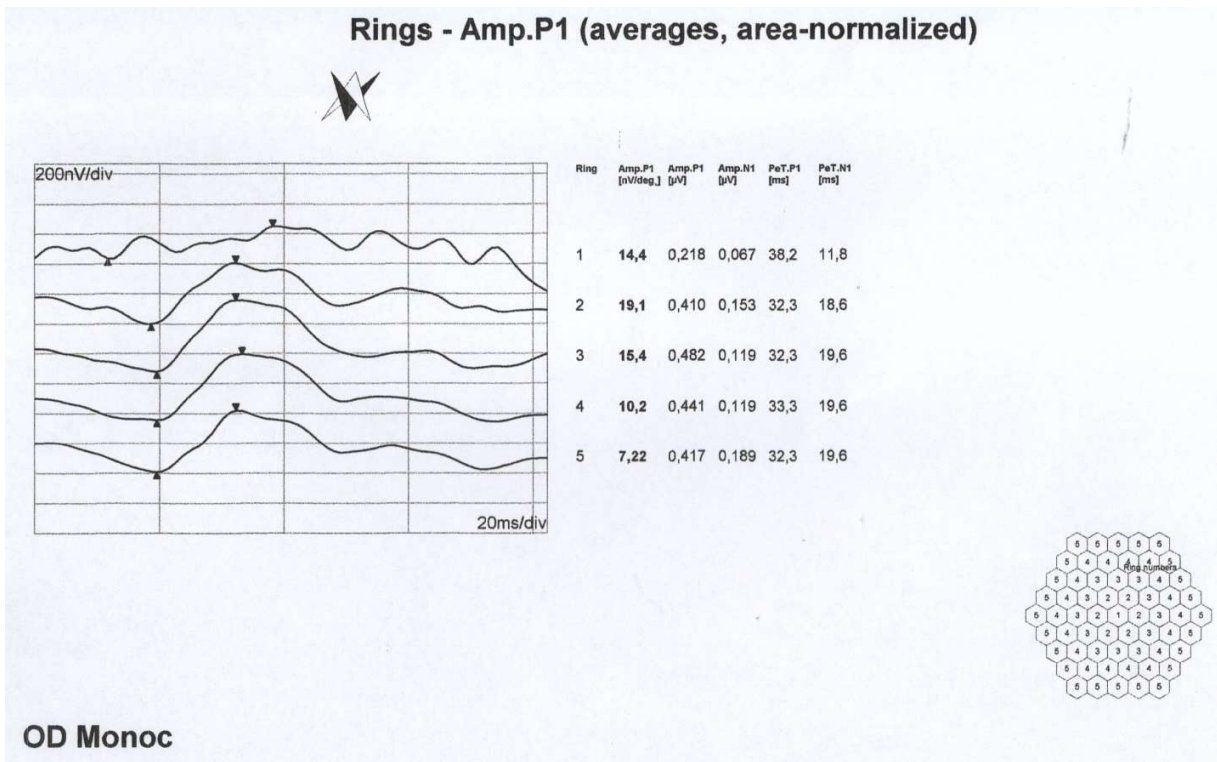

Figure S43. mfERG ring analysis of patient IV/2, OD.

### Rings - Amp.P1 (averages, area-normalized)

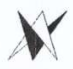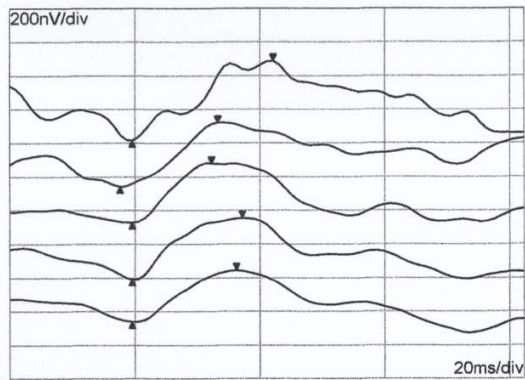

| Ring | Amp.P1<br>[nVdeg.] | Amp.P1<br>[µV] | Amp.N1<br>[µV] | PeT.P1<br>[ms] | PeT.N1<br>[ms] |
|------|--------------------|----------------|----------------|----------------|----------------|
| 1    | 31,6               | 0,478          | 0,174          | 42,1           | 19,6           |
| 2    | 17,6               | 0,379          | 0,167          | 33,3           | 17,6           |
| 3    | 11,3               | 0,354          | 0,069          | 32,3           | 19,6           |
| 4    | 8,41               | 0,366          | 0,167          | 37,2           | 19,6           |
| 5    | 5,34               | 0,308          | 0,123          | 36,3           | 19,6           |

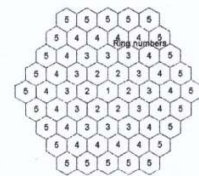

**OS Monoc**

Figure S44. mfERG ring analysis of patient IV/2, OS.

### photopic 3.0

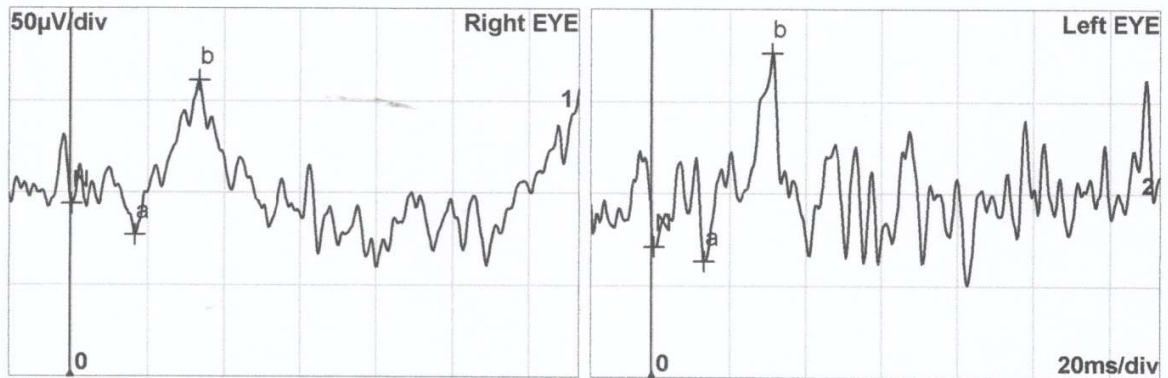

| Channel | a [ms] | b [ms] | a-wave | b-wave |
|---------|--------|--------|--------|--------|
| 1 R-1   | 17     | 34     | 16,6µV | 83,9µV |
| 2 L-2   | 14     | 32     | 7,71µV | 113µV  |

Normals - -

### 30Hz Flicker 3.0

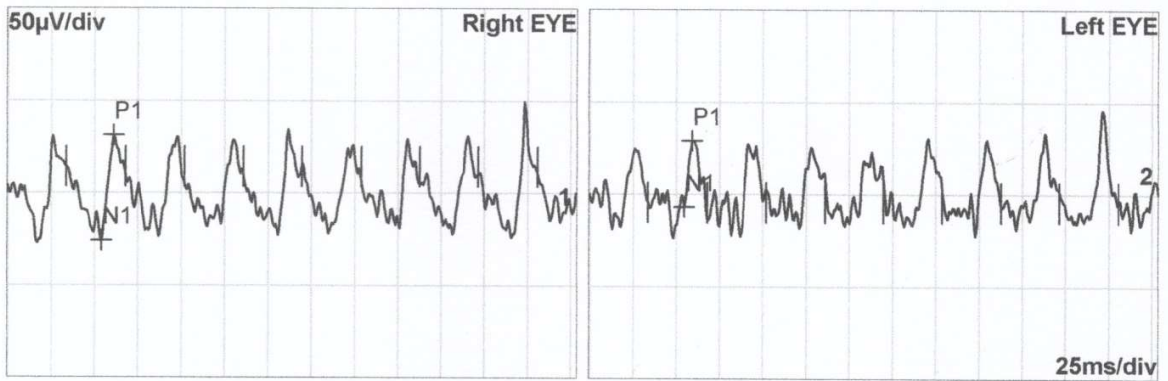

| Channel | N1 [ms] | P1 [ms] | N1-P1  |
|---------|---------|---------|--------|
| 1 R-1   | 55      | 62      | 57µV   |
| 2 L-2   | 56      | 60      | 35,8µV |

Figure S45. Standard full-field ERG recording of patient IV/6.

### Pattern-ERG

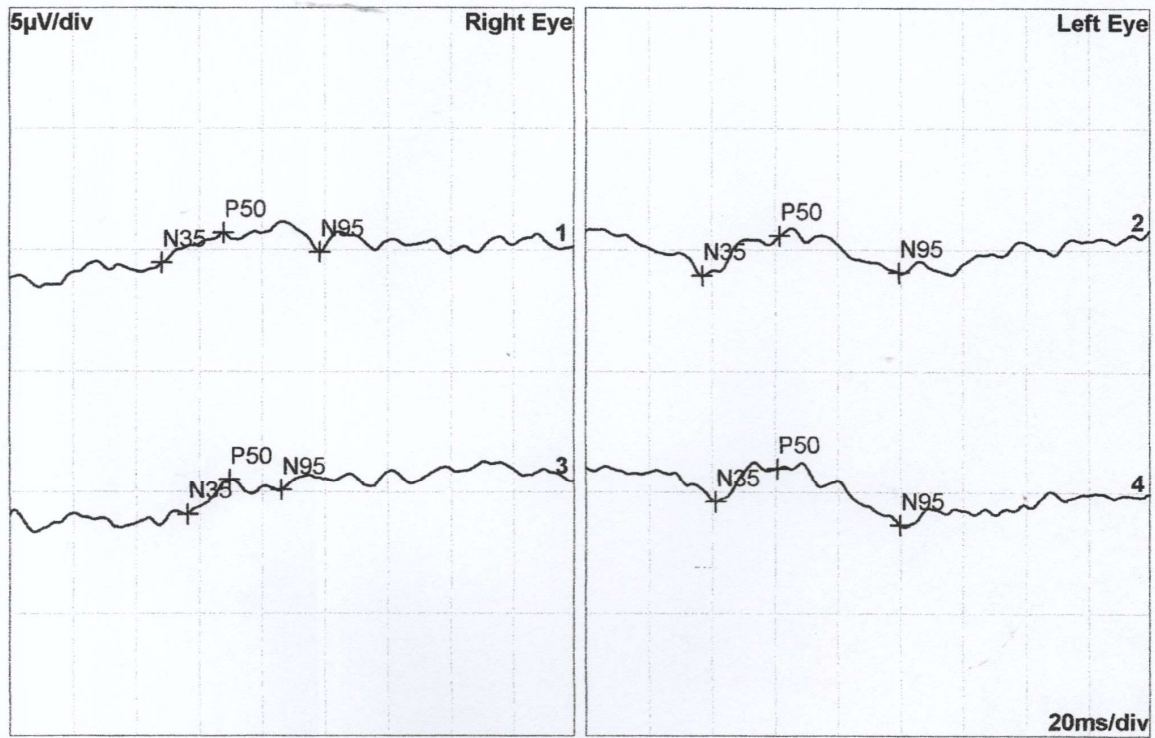

Figure S46. PERG recording of patient IV/6. Lines 1 and 3 and lines 2 and 4 represent pairs of replicate measurements.

### Pattern-VEP

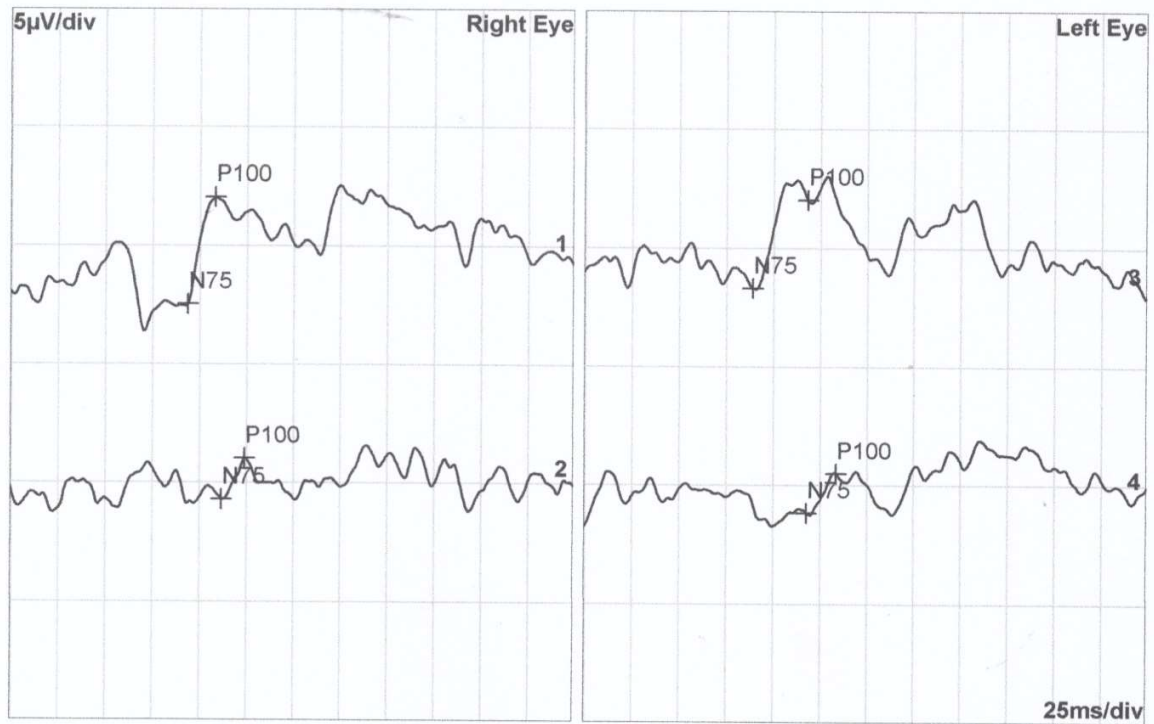



Figure S47. pVEP recording of patient IV/6. Lines 1 and 3 display responses to 60' stimuli and lines 2 and 4 represent responses to 15' stimuli.

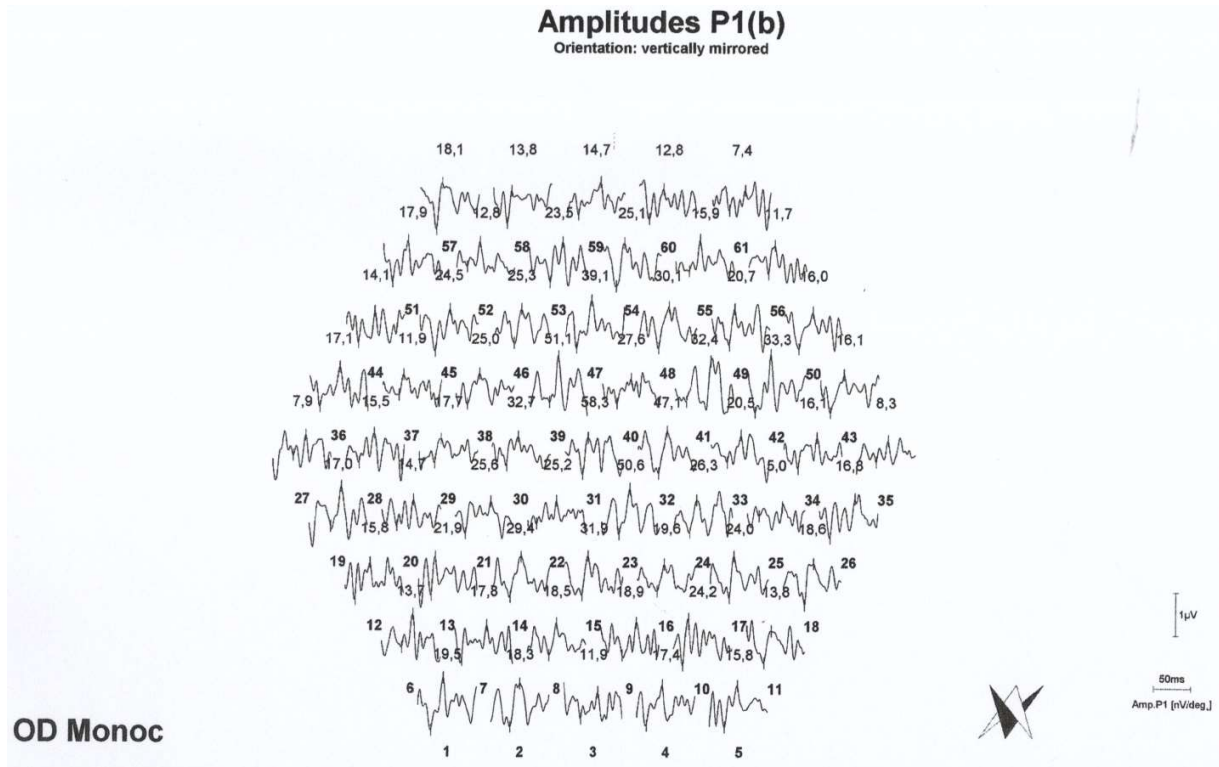

Figure S48. mfERG recording of patient IV/6, OD.

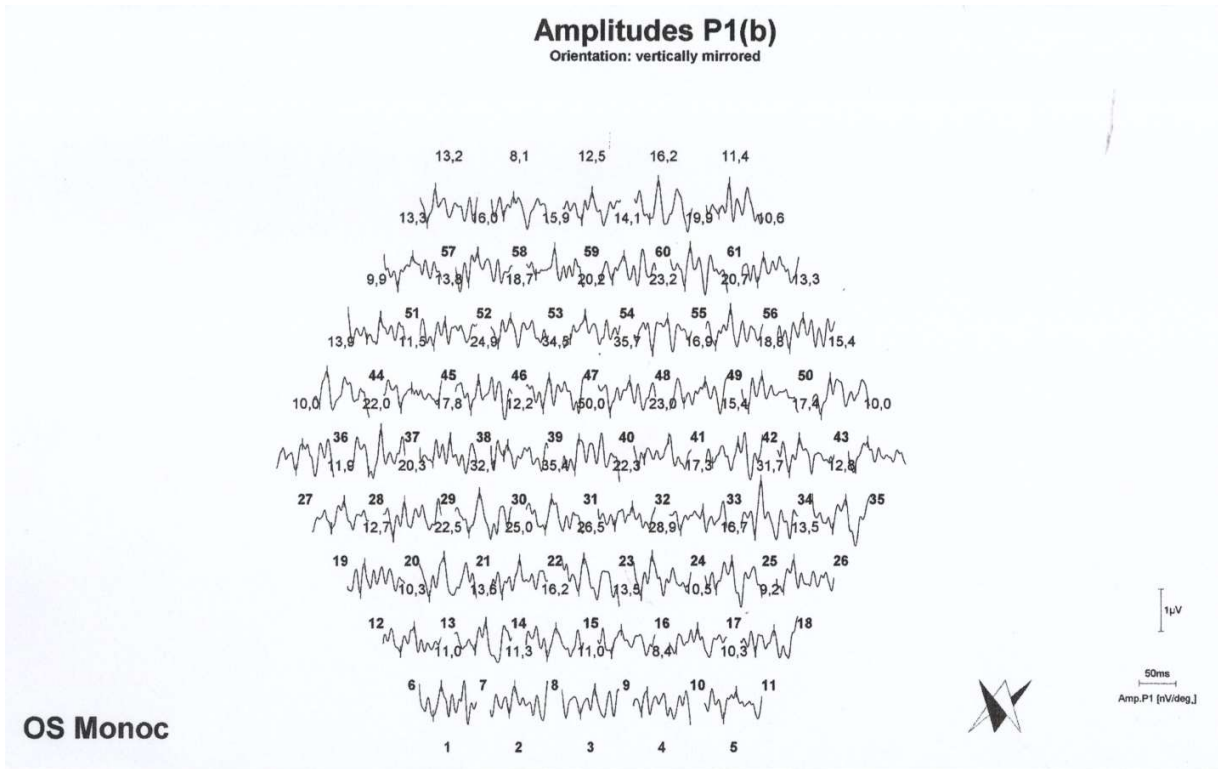

Figure S49. mfERG recording of patient IV/6, OS.

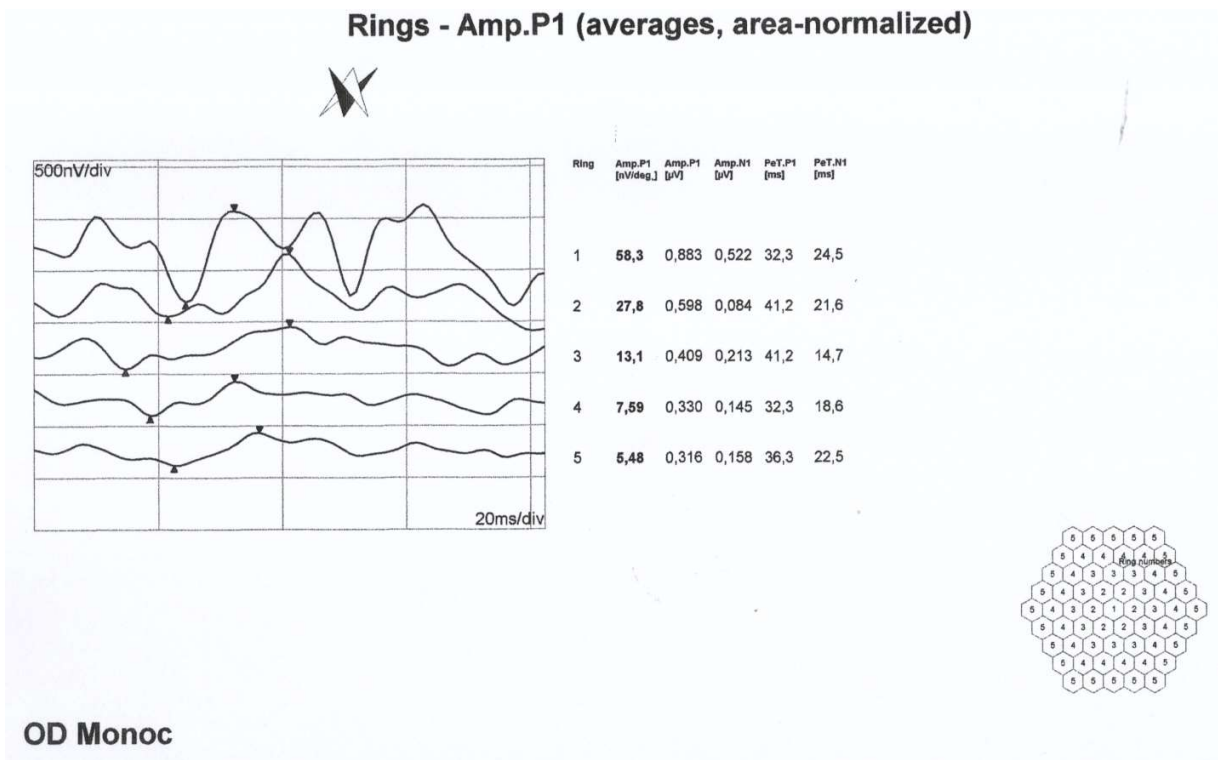

Figure S50. mfERG ring analysis of patient IV/6, OD.

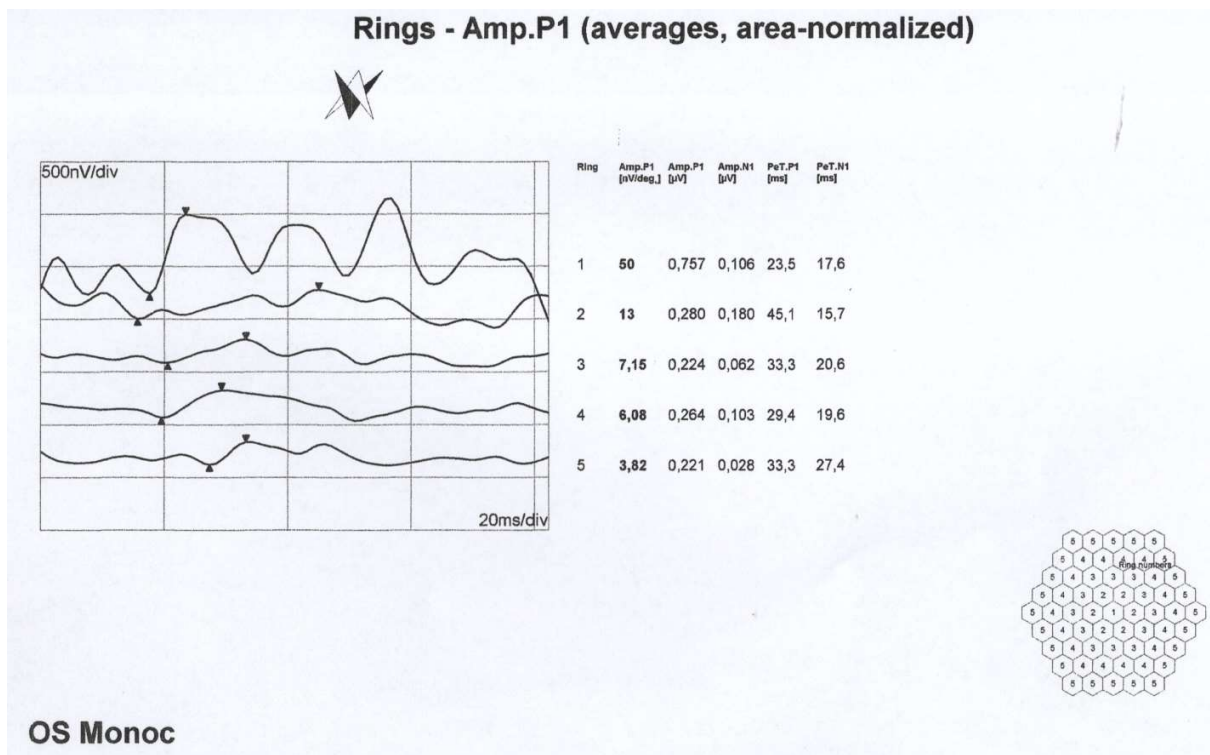

Figure S51. mfERG ring analysis of patient IV/6, OS.

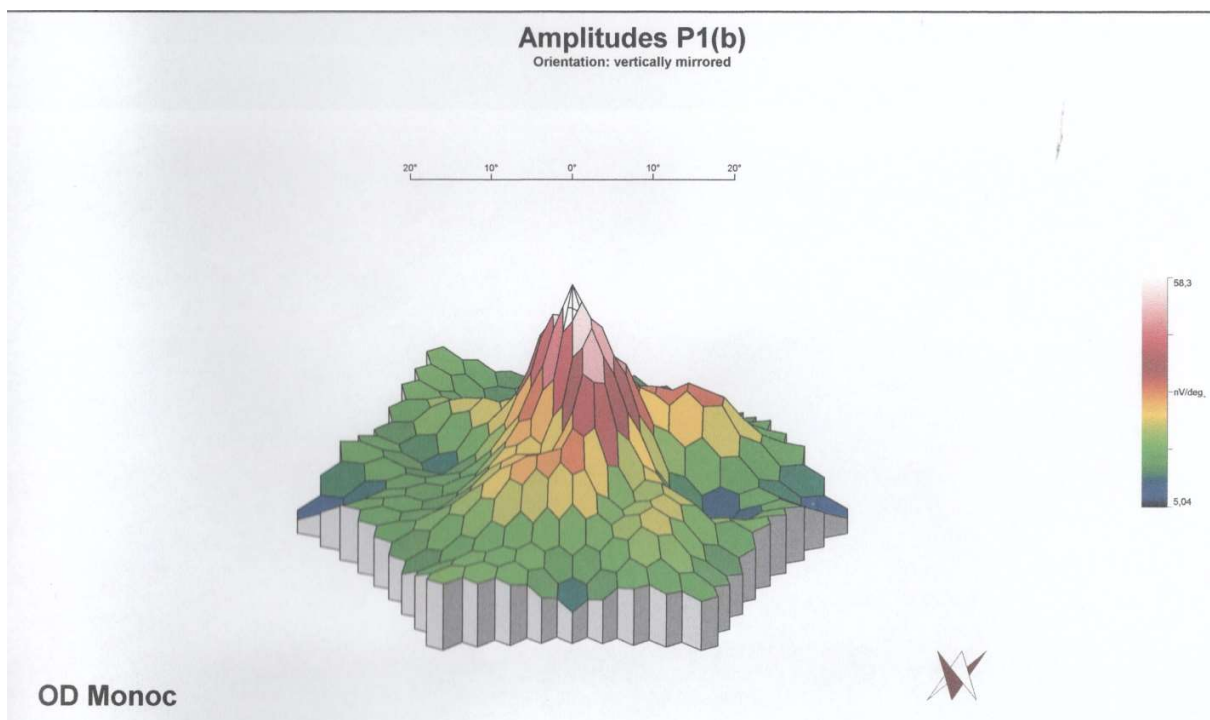

Figure S52. Multifocal ERG 3 D colour map of patient IV/6 severely myopic affected female right eye displays extensive subnormal responses within the whole central 30 degrees.

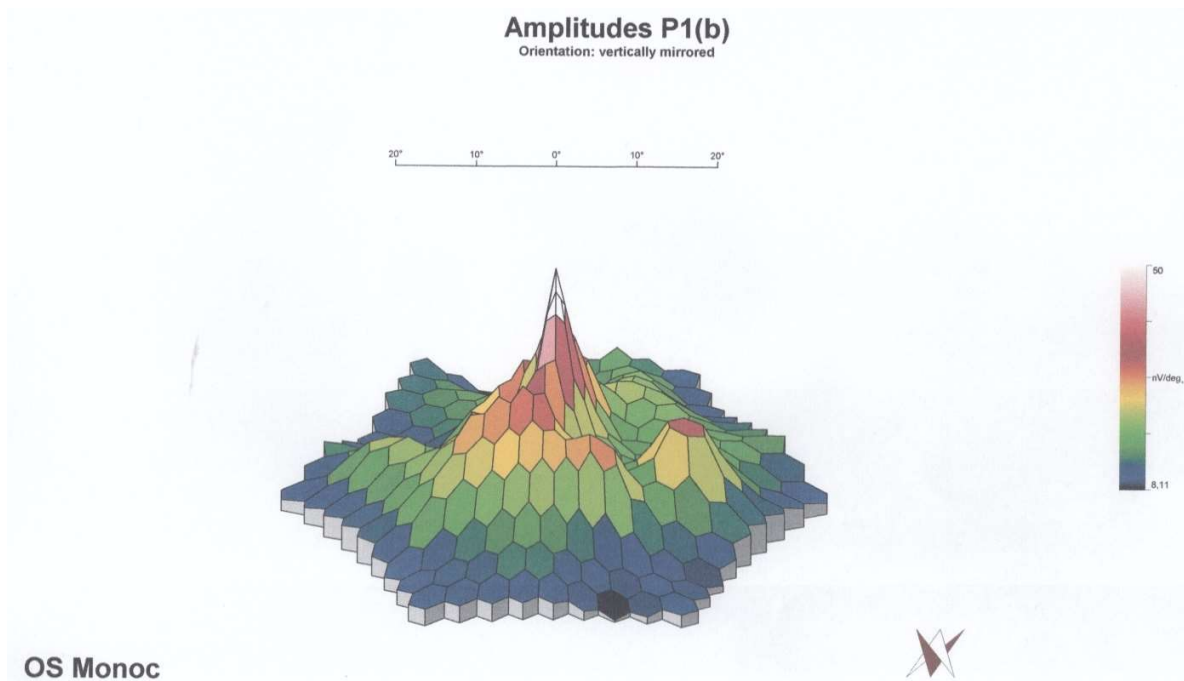

Figure S53. Multifocal ERG 3 D colour map of IV/6 severely myopic affected female left eye displays extensive subnormal responses within the whole central 30 degrees.

# Pattern-ERG

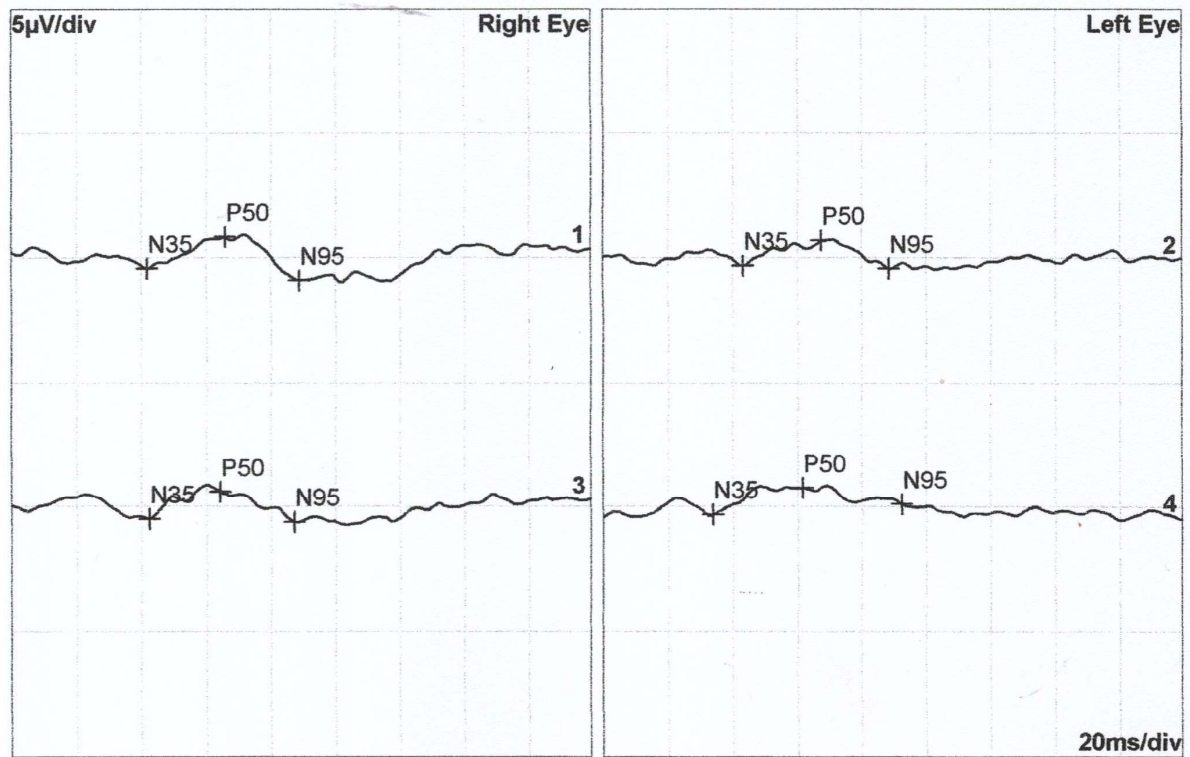

Figure S54. PERG recording of patient IV/10. Lines 1 and 3 and lines 2 and 4 represent pairs of replicate measurements.



### Pattern-VEP

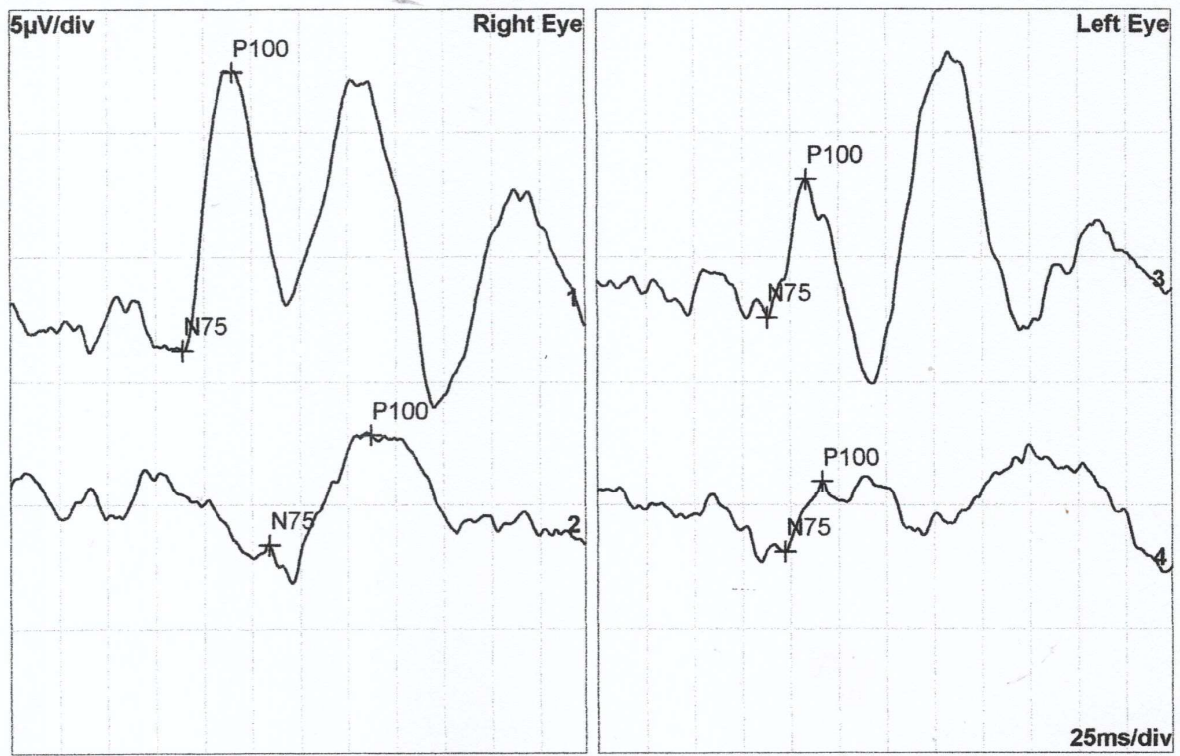

Figure S55. pVEP recording of patient IV/10. Lines 1 and 3 display responses to 60' stimuli and lines 2 and 4 represent responses to 15' stimuli.
